# Supplementary material for: Extracellular Polysaccharide Receptor and Receptor-Binding Proteins of the Rhodobacter capsulatus Bacteriophage-like Gene Transfer Agent RcGTA
Source: MDPI journal article supplement (doi:10.3390/genes14051124), 2023-05-22

**Table S1.** E-values of top hits in BLASTp analysis of the 37b4 genome using WT strain SB1003 homologues of cosmid pCPS1-encoded protein sequences as queries, and reciprocal BLASTp hits.

| <b>SB1003 query<br/>locus/gene name</b> | <b>37b4 top hit locus/gene<br/>name (E-value)</b> | <b>reciprocal blast hit<br/>SB1003 locusgene<br/>name (E-value)</b> |
|-----------------------------------------|---------------------------------------------------|---------------------------------------------------------------------|
| <i>rcc01067</i>                         | none                                              | N/A                                                                 |
| <i>rcc01068</i>                         | none                                              | N/A                                                                 |
| <i>rcc01069</i>                         | none                                              | N/A                                                                 |
| <i>rcc01070</i>                         | none                                              | N/A                                                                 |
| <i>rcc01071</i>                         | none                                              | N/A                                                                 |
| <i>rcc01072/hutH</i>                    | none                                              | N/A                                                                 |
| <i>rcc01073/gvpA</i>                    | none                                              | N/A                                                                 |
| <i>rcc01074</i>                         | none                                              | N/A                                                                 |
| <i>rcc01075</i>                         | <i>rcc01834/mcpH</i> (5E-76)                      | <i>rcc01726/mcpH</i> (0)                                            |
| <i>rcc01076</i>                         | none                                              | N/A                                                                 |
| <i>rcc01077</i>                         | <i>rcc01848</i> (2E-48)                           | <i>rcc01077</i> (6E-61)                                             |
| <i>rcc01078</i>                         | <i>rcc01849</i> (5E-50)                           | <i>rcc01078</i> (2e-44)                                             |
| <i>rcc01087/pip2</i>                    | <i>rcc01521/pip</i> (0.001)                       | <i>rcc02274/pip</i> (0)                                             |
| <i>rcc01088</i>                         | <i>rcc02269</i> (9E-09)                           | <i>rcc01508</i> (4e-145)                                            |
| <i>rcc01079</i>                         | <i>rcc02299</i> (5E-05)                           | <i>rcc00962</i> (3E-41)                                             |
| <i>rcc01080</i>                         | none                                              | N/A                                                                 |
| <i>rcc01081</i>                         | <i>rcc01327</i> (2E-04)                           | none                                                                |
| <i>rcc01082</i>                         | none                                              | N/A                                                                 |
| <i>rcc01083/lsp1</i>                    | <i>rcc02081</i> (0)<br><i>rcc00179</i> (5E-29)    | <i>rcc01952/lsp2</i> (0)                                            |
| <i>rcc01084</i>                         | none                                              | N/A                                                                 |
| <i>rcc01085</i>                         | none                                              | N/A                                                                 |
| <i>rcc01086</i>                         | <i>rcc03284</i> (0)                               | <i>rcc03089</i> (0)                                                 |
| <i>rcc01932</i>                         | <i>rcc02060</i> (E-174)                           | <i>rcc01932</i> (0)                                                 |
| <i>rcc01958/wzc</i>                     | <i>rcc02087</i> (0)                               | <i>rcc01958/wzc</i> (0)                                             |
| <i>rcc01959/wzb</i>                     | <i>rcc02088</i> (2E-83)                           | <i>rcc01959/wzb</i> (0)                                             |
| <i>rcc01960/wza</i>                     | <i>rcc02089</i> (0)                               | <i>rcc01960/wza</i> (0)                                             |
| <i>rcc00197/comF</i>                    | <i>rcc00201</i> (5E-132)                          | <i>rcc00197/comF</i> (3E-122)                                       |
| <i>rcc00460/comM</i>                    | <i>rcc00465</i> (0)                               | <i>rcc00460/comM</i> (0)                                            |
| <i>rcc03098/dprA</i>                    | <i>rcc03293</i> (0)                               | <i>rcc03098/dprA</i> (8E-134)                                       |
| <i>rcc01751/recA</i>                    | <i>rcc02029</i> (0)                               | <i>rcc01751/recA</i> (0)                                            |
| <i>rcc00222/radC</i>                    | <i>rcc00227</i> (0)                               | <i>rcc00222/radC</i> (0)                                            |

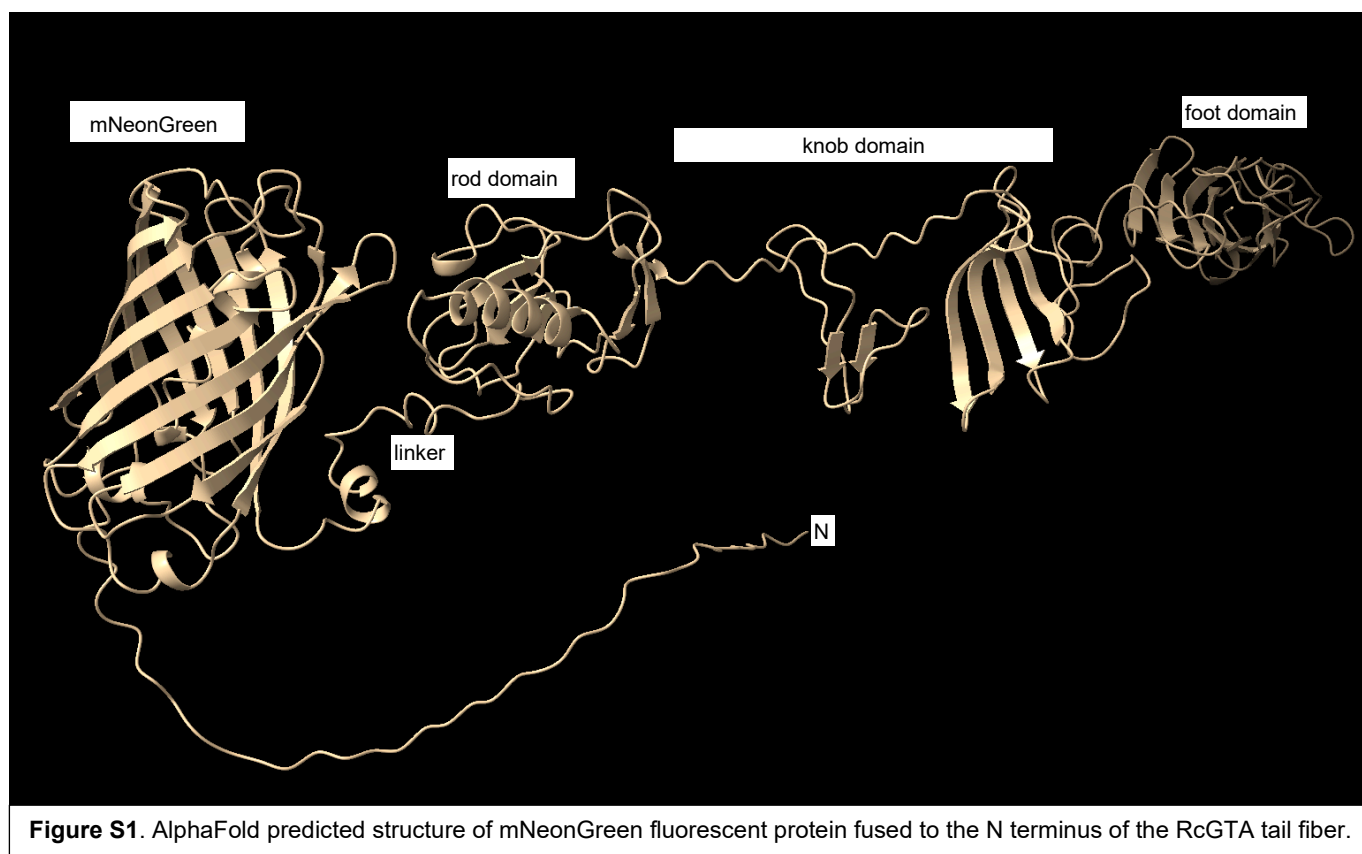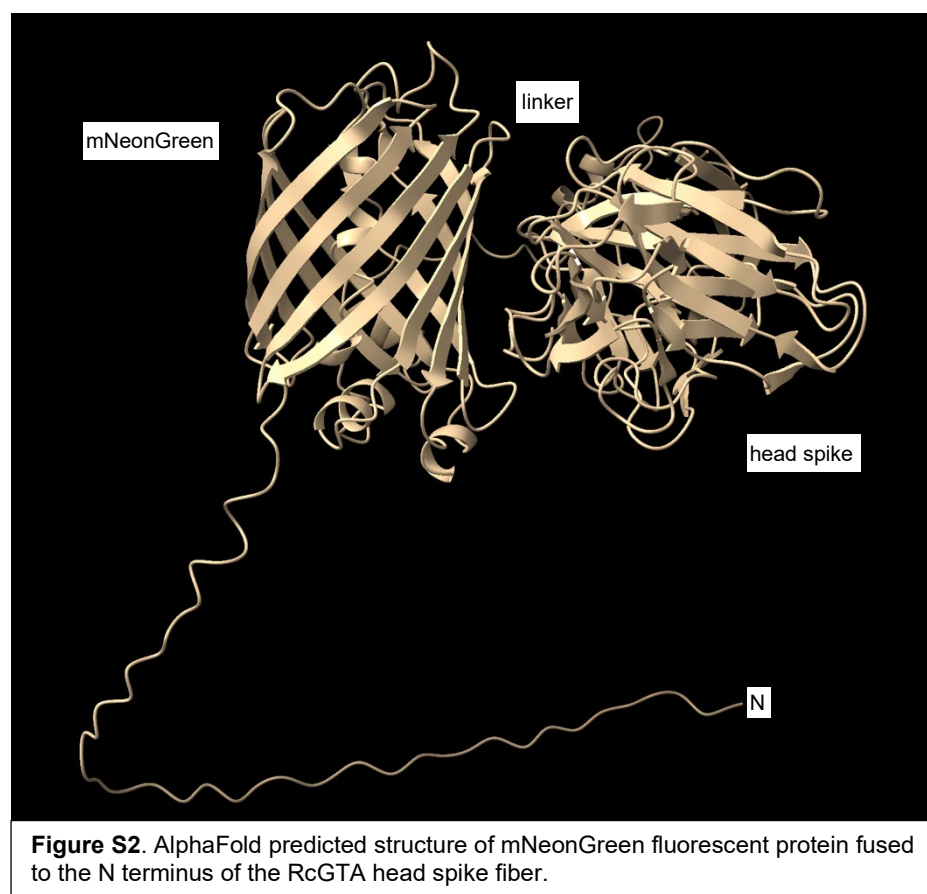

Supplement: s1 [file s1]
